# Supplementary material
Source: Springer Nature journal article supplement (https://www.springermedizin.de/resource/supplementary/13049_2013_747_MOESM1_ESM.pdf/9667212)

**A**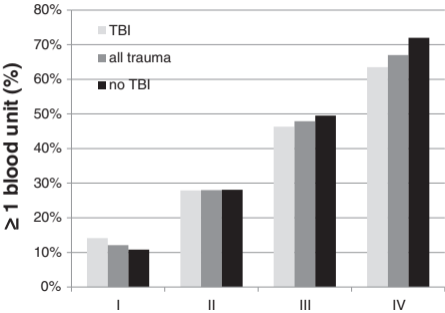**B**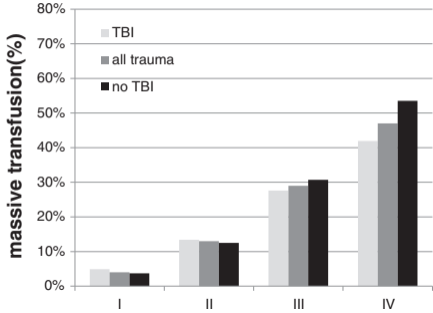

Supplement: MOESM1 [file 9667212]
